# Supplementary material for: A one-pot regioselective synthesis of benzo[d]imidazo[2,1-b]thiazoles
Source: Royal Society of Chemistry journal article supplement (doi:10.1039/c2ob26211h), 2012-01-01

## *Supporting Information for*

### A one-pot regioselective synthesis of benzo[*d*]imidazo[2,1-*b*]thiazoles

Xinhai Zhang, Jiong Jia and Chen Ma\*

#### Table of content

|                                                                                                                    |        |
|--------------------------------------------------------------------------------------------------------------------|--------|
| X-ray structure data of compound <b>3a</b>                                                                         | S2     |
| Characterization of <b>3a-3n</b> , <b>4b</b> , <b>4c</b> , <b>4g</b> , <b>4d</b>                                   | S3-S7  |
| <sup>1</sup> H NMR and <sup>13</sup> C NMR spectra of <b>3a-3n</b> , <b>4b</b> , <b>4c</b> , <b>4g</b> , <b>4d</b> | S8-S21 |

Electronic Supplementary Material (ESI) for Organic & Biomolecular Chemistry  
This journal is © The Royal Society of Chemistry 2012

Table 1 X-ray structure data of compound **3a**

| Compound reference                                                            | <b>3a</b>                                                      |
|-------------------------------------------------------------------------------|----------------------------------------------------------------|
| Chemical formula                                                              | C <sub>13</sub> H <sub>6</sub> F <sub>3</sub> N <sub>5</sub> S |
| Formula Mass                                                                  | 293.27                                                         |
| Crystal system                                                                | Orthorhombic                                                   |
| <i>a</i> /Å                                                                   | 17.790(4)                                                      |
| <i>b</i> /Å                                                                   | 20.166(4)                                                      |
| <i>c</i> /Å                                                                   | 6.7371(13)                                                     |
| $\alpha$ /°                                                                   | 90.00                                                          |
| $\beta$ /°                                                                    | 90.00                                                          |
| $\gamma$ /°                                                                   | 90.00                                                          |
| Unit cell volume/Å <sup>3</sup>                                               | 2417.0(8)                                                      |
| Temperature/K                                                                 | 273(2)                                                         |
| Space group                                                                   | <i>Aba2</i>                                                    |
| No. of formula units per unit cell, <i>Z</i>                                  | 8                                                              |
| No. of reflections measured                                                   | 5767                                                           |
| No. of independent reflections                                                | 2104                                                           |
| <i>R</i> <sub>int</sub>                                                       | 0.0257                                                         |
| Final <i>R</i> <sub><i>I</i></sub> values ( <i>I</i> > 2σ( <i>I</i> ))        | 0.0317                                                         |
| Final <i>wR</i> ( <i>F</i> <sup>2</sup> ) values ( <i>I</i> > 2σ( <i>I</i> )) | 0.0760                                                         |
| Final <i>R</i> <sub><i>I</i></sub> values (all data)                          | 0.0450                                                         |
| Final <i>wR</i> ( <i>F</i> <sup>2</sup> ) values (all data)                   | 0.0841                                                         |

Electronic Supplementary Material (ESI) for Organic & Biomolecular Chemistry  
This journal is © The Royal Society of Chemistry 2012

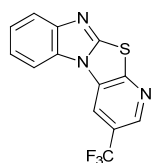

3a

**3-(Trifluoromethyl)benzo[4',5']imidazo[2',1':2,3]thiazolo[5,4-*b*]pyridine (3a)** white solid (64%), mp 270-271°C. <sup>1</sup>H NMR (300 MHz, CDCl<sub>3</sub>) δ 8.76 (s, 1H), 8.25 (s, 1H), 7.88-7.94 (m, 2H), 7.44-7.52 (m, 2H); <sup>13</sup>C NMR (100 MHz, CDCl<sub>3</sub>) δ 110.50 114.62 (d, *J* = 3.5 Hz) 120.31 121.99 123.15 124.36 124.72 128.57 130.19 141.71 (t, *J* = 3.3 Hz) 147.24 152.82 156.71. HRMS calcd for (M+H<sup>+</sup>) 294.0268; found: 294.0292.

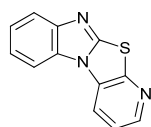

3b

**Benzo[4',5']imidazo[2',1':2,3]thiazolo[5,4-*b*]pyridine (3b)** light yellow solid (67%), mp 183-186°C. <sup>1</sup>H NMR (300 MHz, CDCl<sub>3</sub>) δ 8.48 (dd, *J* = 1.2, 1.5 Hz, 1H), 8.11 (d, *J* = 8.1 Hz, 1H), 7.85 (dd, *J* = 1.8 Hz, 1H), 7.36-7.49 (m, 4H); <sup>13</sup>C NMR (75 MHz, CDCl<sub>3</sub>) δ 110.31 118.22 119.77 121.02 122.50 124.07 128.78 130.23 145.16 146.91 152.53 153.02. HRMS calcd for (M+H<sup>+</sup>) 226.0394; found: 226.0427.

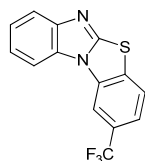

3c

**2-(Trifluoromethyl)benzo[*d*]benzo[4,5]imidazo[2,1-*b*]thiazole (3c)** white solid (72%), mp 211-213°C. <sup>1</sup>H NMR (300 MHz, CDCl<sub>3</sub>) δ 8.13 (s, 1H), δ 7.95-7.99 (m, 1H), 7.58-7.88 (m, 1H), 7.63 (d, *J* = 8.4 Hz, 2H), 7.41-7.49 (m, 2H); <sup>13</sup>C NMR (75 MHz, CDCl<sub>3</sub>) δ 112.78 115.91 118.80 122.73 123.82 124.16 124.48 (d, *J* = 3.75 Hz) 129.94 (d, *J* = 1.5 Hz) 133.62 144.19 (t, *J* = 4 Hz) 145.51 147.34 147.86 156.43. HRMS calcd for (M+H<sup>+</sup>) 293.0316; found: 293.0372.

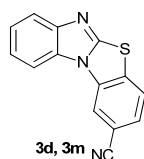

3d, 3m

**Benzo[*d*]benzo[4,5]imidazo[2,1-*b*]thiazole-2-carbonitrile (3d, 3m)** white solid (68%, 43%), mp 274-276 °C. <sup>1</sup>H NMR (300 MHz, CDCl<sub>3</sub>) δ 8.17(d, *J* = 1.2 Hz, 1H), 7.94-7.97 (m, 1H), 7.85-7.88 (m, 2H), 7.66 (dd, *J* = 1.5, 1.2 Hz, 1H), 7.43-7.51 (m, 2H). <sup>13</sup>C NMR (75 MHz, CDCl<sub>3</sub>) δ 112.78 115.89 118.79 121.71 123.80 124.13 124.46 129.94 133.59 144.16 145.45 147.31 147.82 156.43. HRMS calcd for (M+H<sup>+</sup>) 250.0394; found: 250.0434.

Electronic Supplementary Material (ESI) for Organic & Biomolecular Chemistry  
This journal is © The Royal Society of Chemistry 2012

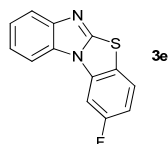

**2-Fluorobenzo[d]benzo[4,5]imidazo[2,1-b]thiazole (3e)** white solid (54%), mp 163-166 °C.  $^1\text{H}$  NMR (300 MHz, DMSO- $d_6$ )  $\delta$  8.32-8.46 (m, 2H), 8.06-8.14 (m, 1H), 7.76 (dd,  $J = 2.4$ , 2.1 Hz, 1H), 7.13-7.52 (m, 3H);  $^{13}\text{C}$  NMR (100 MHz, DMSO)  $\delta$  106.54 (d,  $J = 28.5$  Hz) 117.03 (t,  $J = 16.2$  Hz) 123.93 127.15 128.65 (d,  $J = 2.4$  Hz) 131.45 (d,  $J = 9.7$  Hz) 135.08 (d,  $J = 12$  Hz) 152.75 160.90 165.48 167.90. HRMS calcd for ( $\text{M}+\text{H}^+$ ) 243.0348; found: 243.0375.

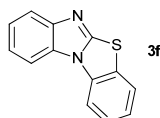

**Benzo[d]benzo[4,5]imidazo[2,1-b]thiazole (3f, 3g, 3h)** white solid (62%, 77%, 71%), mp 139-141 °C.  $^1\text{H}$  NMR (400 MHz,  $\text{CDCl}_3$ )  $\delta$  7.97 (d,  $J = 8.36$  Hz, 2H), 7.85 (dd,  $J = 1.36$ , 1.28 Hz, 1H), 7.76 (d,  $J = 8$  Hz, 1H), 7.54-7.58 (m, 1H), 7.37-7.46 (m, 3H);  $^{13}\text{C}$  NMR (100 MHz,  $\text{CDCl}_3$ )  $\delta$  110.62 112.41 119.45 122.02 123.68 124.35 124.46 126.74 129.05 130.44 133.22 147.94 155.35. HRMS calcd for ( $\text{M}+\text{H}^+$ ) 225.0442; found: 225.0468.

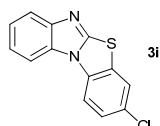

**3-Chlorobenzo[d]benzo[4,5]imidazo[2,1-b]thiazole (3i)** white solid (69%), mp 210-212 °C.  $^1\text{H}$  NMR (400 MHz,  $\text{CDCl}_3$ )  $\delta$  7.89 (d,  $J = 7.32$  Hz, 1H), 7.83 (d,  $J = 8.56$  Hz, 2H), 7.72 (d,  $J = 1.96$  Hz, 1H), 7.51 (dd,  $J = 2$  Hz, 1H), 7.36-7.45 (m, 2H);  $^{13}\text{C}$  NMR (100 MHz,  $\text{CDCl}_3$ )  $\delta$  110.37 112.81 119.68 122.19 123.79 124.07 126.94 129.82 130.25 130.49 131.71 148.08 154.89. HRMS calcd for ( $\text{M}+\text{H}^+$ ) 259.9989; found: 259.0087.

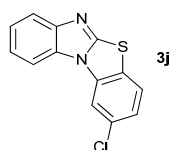

**2-Chlorobenzo[d]benzo[4,5]imidazo[2,1-b]thiazole (3j)** white solid (85%), mp 233-236 °C.  $^1\text{H}$  NMR (400 MHz,  $\text{CDCl}_3$ )  $\delta$  7.93 (dd,  $J = 1.92$ , 1.32 Hz, 2H), 7.84 (dd,  $J = 1.32$ , 1.48 Hz, 1H),  $\delta$  7.65 (d,  $J = 8.52$  Hz, 1H),  $\delta$  7.37-7.45 (m, 2H), 7.36 (dd,  $J = 1.92$  Hz, 1H);  $^{13}\text{C}$  NMR (100 MHz,  $\text{CDCl}_3$ )  $\delta$  110.64 112.84 119.63 122.40 124.10 124.65 124.99 127.35 130.21 132.88 133.83 147.89 155.54. HRMS calcd for ( $\text{M}+\text{H}^+$ ) 259.9989; found: 259.0087.

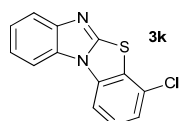

**4-Chlorobenzo[d]benzo[4,5]imidazo[2,1-b]thiazole (3k)** white solid (83%), mp 198-201 °C.  $^1\text{H}$  NMR (400 MHz,  $\text{CDCl}_3$ )  $\delta$  7.91 (d,  $J = 8.04$  Hz, 1H), 7.84 (t,  $J = 6.2$ , 7.64 Hz, 2H), 7.50 (t,  $J = 8$  Hz, 1H)  $\delta$  7.34-7.44 (m, 3H);  $^{13}\text{C}$  NMR (100 MHz,  $\text{CDCl}_3$ )  $\delta$  110.27 110.51 119.73 122.27 123.90

Electronic Supplementary Material (ESI) for Organic & Biomolecular Chemistry  
This journal is © The Royal Society of Chemistry 2012

124.17 127.60 128.92 129.28. 130.36 134.07 148.05 154.63. HRMS calcd for (M+H<sup>+</sup>) 259.9989;  
found: 259.0083.

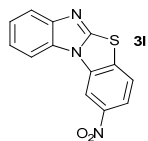

**2-Nitrobenzo[d]benzo[4,5]imidazo[2,1-b]thiazole (3l)** yellow solid (54%), mp 274-277°C. <sup>1</sup>H NMR (400 MHz, CDCl<sub>3</sub>) δ 8.75 (s, 1H), 8.30 (d, *J* = 8.32 Hz, 1H), 8.05 (d, *J* = 4.72 Hz, 1H), 7.87-7.92 (m, 2H), 7.50 (d, *J* = 3.72 Hz, 2H); <sup>13</sup>C NMR (100 MHz, CDCl<sub>3</sub>) δ 107.31 110.82 119.44 120.06 123.15 124.54 124.67 130.32 133.27136.75 146.70 147.91 154.95. HRMS calcd for (M+H<sup>+</sup>) 270.0293; found: 270.0333.

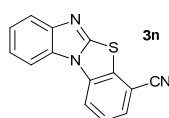

**Benzo[d]benzo[4,5]imidazo[2,1-b]thiazole-4-carbonitrile (3n)** light yellow solid (53%), mp 232-234°C. <sup>1</sup>H NMR (400 MHz, CDCl<sub>3</sub>) δ 9.05 (d, *J* = 8 Hz, 1H), 7.34 (dd, *J* = 1.24 Hz, 1H), 7.82 (m, 2H), 7.39-7.48 (m, 3H); <sup>13</sup>C NMR (100 MHz, CDCl<sub>3</sub>) δ 97.56 114.46 119.10 119.54 122.85 124.28 124.71 128.90 131.21 131.33 132.88 134.91 148.26 154.91. HRMS calcd for (M+H<sup>+</sup>) 250.0394; found: 250.0433.

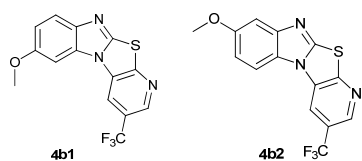

**7-Methoxy-3-(trifluoromethyl)benzo[4',5']imidazo[2',1':2,3]thiazolo[5,4-b]pyridine (4b1), 8-methoxy-3-(trifluoromethyl)benzo[4',5']imidazo[2',1':2,3]thiazolo[5,4-b]pyridine (4b2)** white solid (81%), mp 225-227°C. <sup>1</sup>H NMR (300 MHz, CDCl<sub>3</sub>) δ 8.75 (s, 1H), 8.14 (d, *J* = 1.5 Hz), 7.77 (dd, *J* = 4.2 Hz, 1H), 7.35 (dd, *J* = 2.4 Hz, 1H), 7.09 (dd, *J* = 2.4 Hz, 1H), 3.97(s, 3H); <sup>13</sup>C NMR (75 MHz, CDCl<sub>3</sub>) δ 56.29 95.09 102.89 110.78 112.56 114.40 (q, *J* = 3.75 Hz) 120.45 124.57 128.41 130.57 141.66 (t, *J* = 4.5 Hz) 151.17 156.66 157.82. HRMS calcd for (M+H<sup>+</sup>) 324.0374; found: 324.0406.

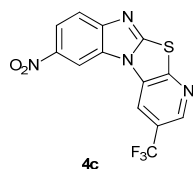

**7-Nitro-3-(trifluoromethyl)benzo[4',5']imidazo[2',1':2,3]thiazolo[5,4-b]pyridine (4c)** yellow solid (27%), mp 241-244°C. <sup>1</sup>H NMR (400 MHz, CDCl<sub>3</sub>) δ 8.85 (d, *J* = 0.88 Hz, 1H), 8.75 (d, *J* = 2.04 Hz, 1H), 8.51 (d, *J* = 8.84 Hz, 1H), 7.39-7.48 (m, 2H); <sup>13</sup>C NMR (100 MHz, CDCl<sub>3</sub>) δ 112.78 115.91 118.80 121.73 123.82 124.53 (d, *J* = 8.4 Hz) 129.94 (d, *J* = 3.4 Hz) 133.62 144.19 (t) 145.51 147.34 147.86 156.43. HRMS calcd for (M+H<sup>+</sup>) 339.0119; found: 339.0151.

Electronic Supplementary Material (ESI) for Organic & Biomolecular Chemistry  
This journal is © The Royal Society of Chemistry 2012

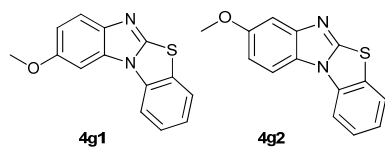

**9-Methoxybenzo[*d*]benzo[4,5]imidazo[2,1-*b*]thiazole (4g1), 8-methoxybenzo[*d*]benzo[4,5]imidazo[2,1-*b*]thiazole (4g2)** white solid (79%), mp 123-125°C.  $^1\text{H}$  NMR (400 MHz,  $\text{CDCl}_3$ )  $\delta$  8.85 (dd,  $J = 3.2$  Hz, 2H), 8.75 (d,  $J = 4.8$  Hz, 1H), 7.69- 7.72 (m, 3H), 7.52 (t, 2H)  $\delta$  7.41 (d,  $J = 2.24$  Hz, 1H), 7.31-7.36 (m, 3H), 6.97-7.05 (m, 2H), 3.92 (s, 6H);  $^{13}\text{C}$  NMR (100 MHz,  $\text{CDCl}_3$ )  $\delta$  56.13 95.62 102.28 110.77 111.18 111.59 112.14 119.72 124.25 126.58 128.09 133.08 155.74 156.89. HRMS calcd for ( $\text{M}+\text{H}^+$ ) 255.0547; found: 255.0614.

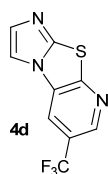

**6-(Trifluoromethyl)imidazo[2',1':2,3]thiazolo[5,4-*b*]pyridine (4d)** white solid (67%), mp 128-130°C.  $^1\text{H}$  NMR (400 MHz,  $\text{CDCl}_3$ )  $\delta$  8.72 (s, 1H), 8.28(s, 1H), 7.99 (s, 1H), 7.46 (s, 1H);  $^{13}\text{C}$  NMR (75 MHz,  $\text{CDCl}_3$ )  $\delta$  112.67 121.40 123.72 125.87 129.89 (q,  $J = 3.75$  Hz) 135.96 143.22 (q,  $J = 4.5$  Hz) 146.32 146.95. HRMS calcd for ( $\text{M}+\text{H}^+$ ) 244.0112; found: 244.0187.

Electronic Supplementary Material (ESI) for Organic & Biomolecular Chemistry  
This journal is © The Royal Society of Chemistry 2012

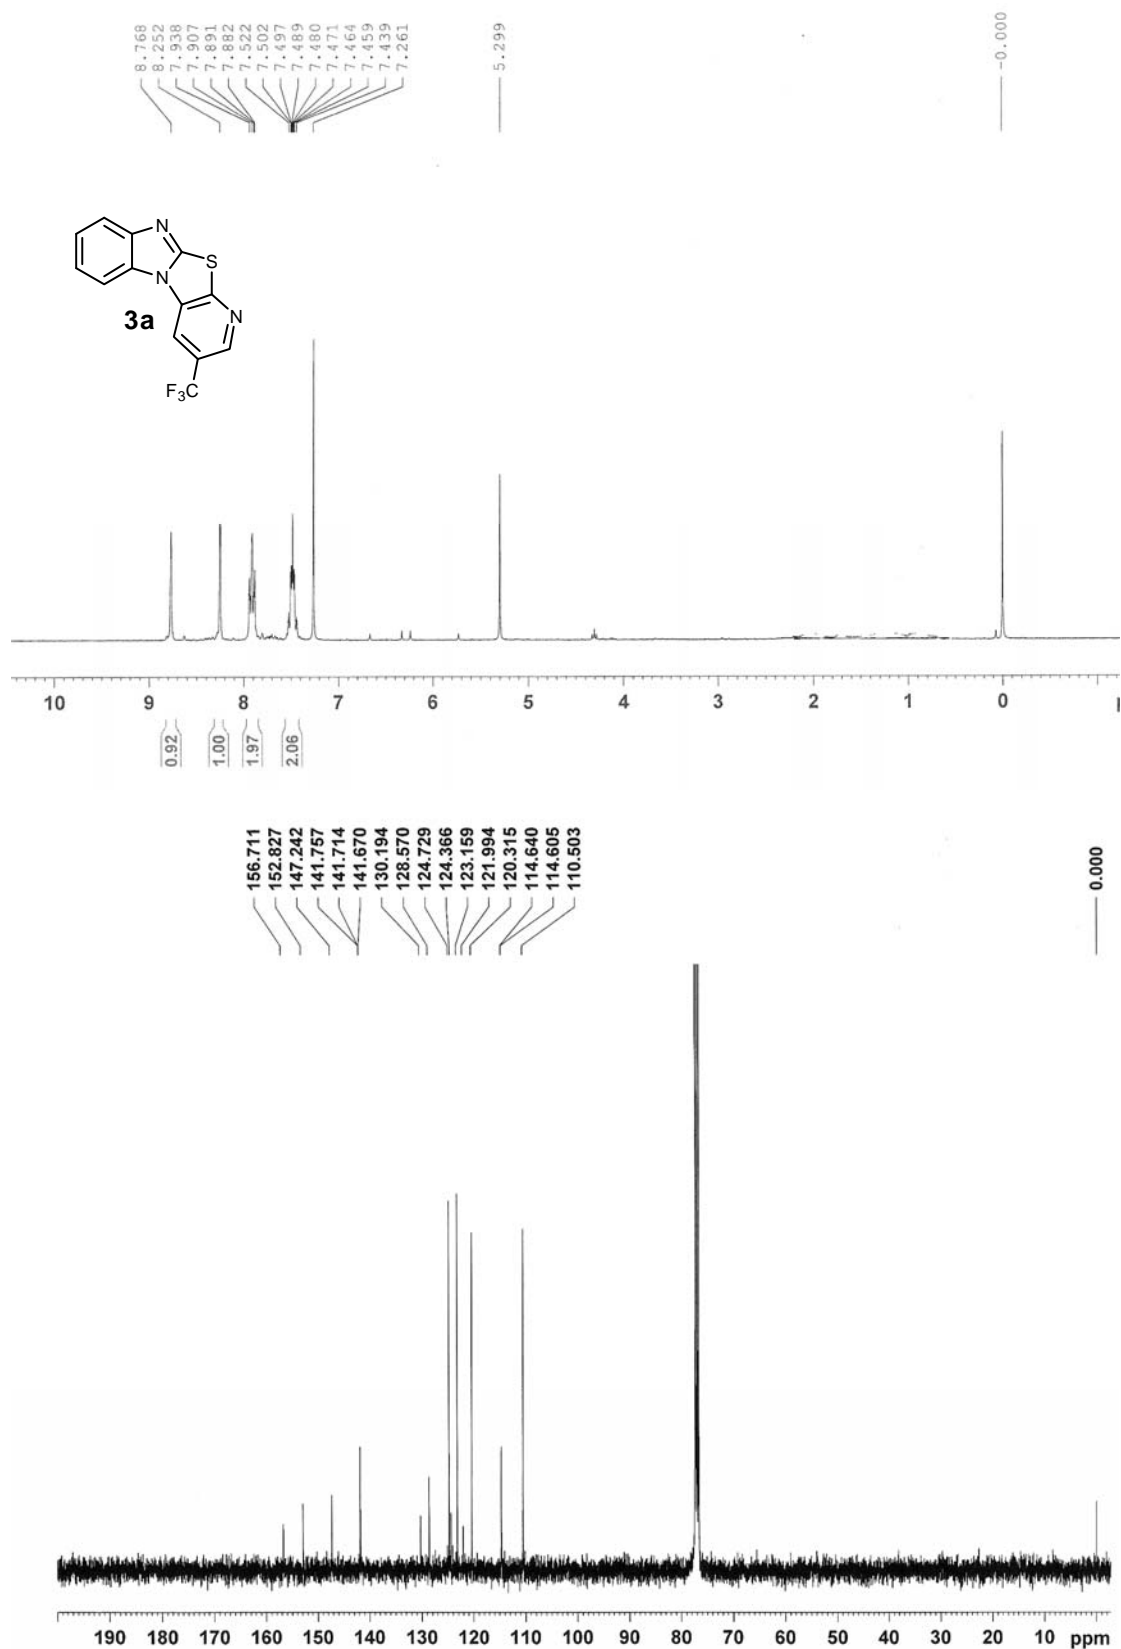

Electronic Supplementary Material (ESI) for Organic & Biomolecular Chemistry  
This journal is © The Royal Society of Chemistry 2012

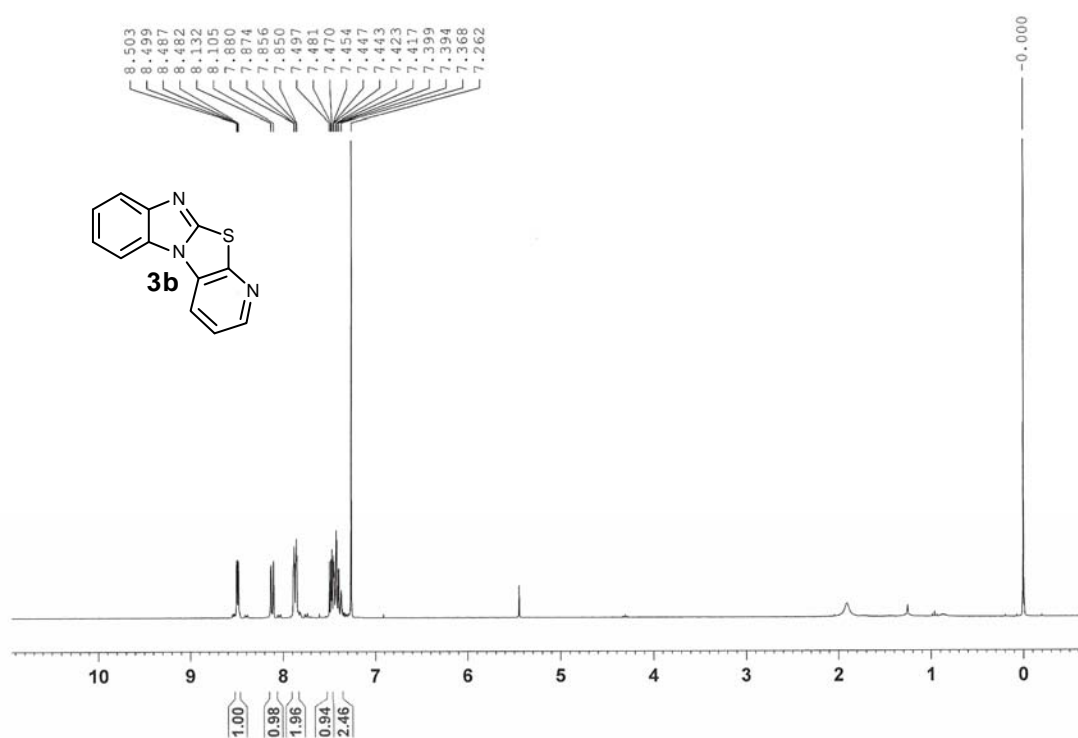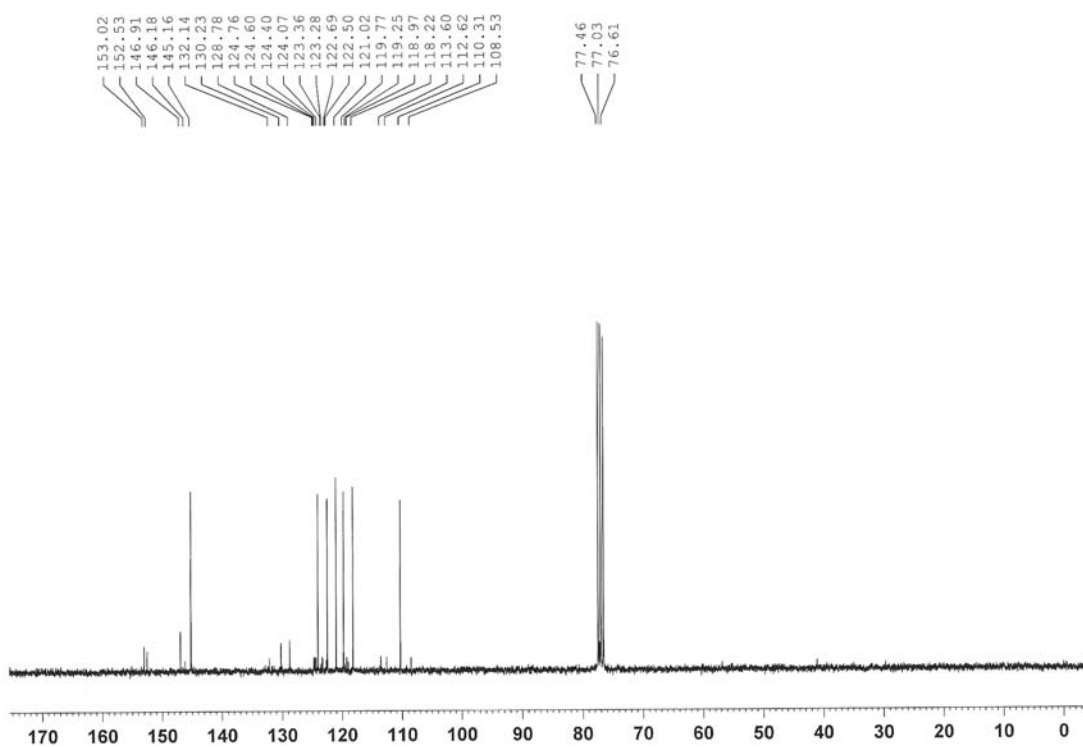



Electronic Supplementary Material (ESI) for Organic & Biomolecular Chemistry  
This journal is © The Royal Society of Chemistry 2012

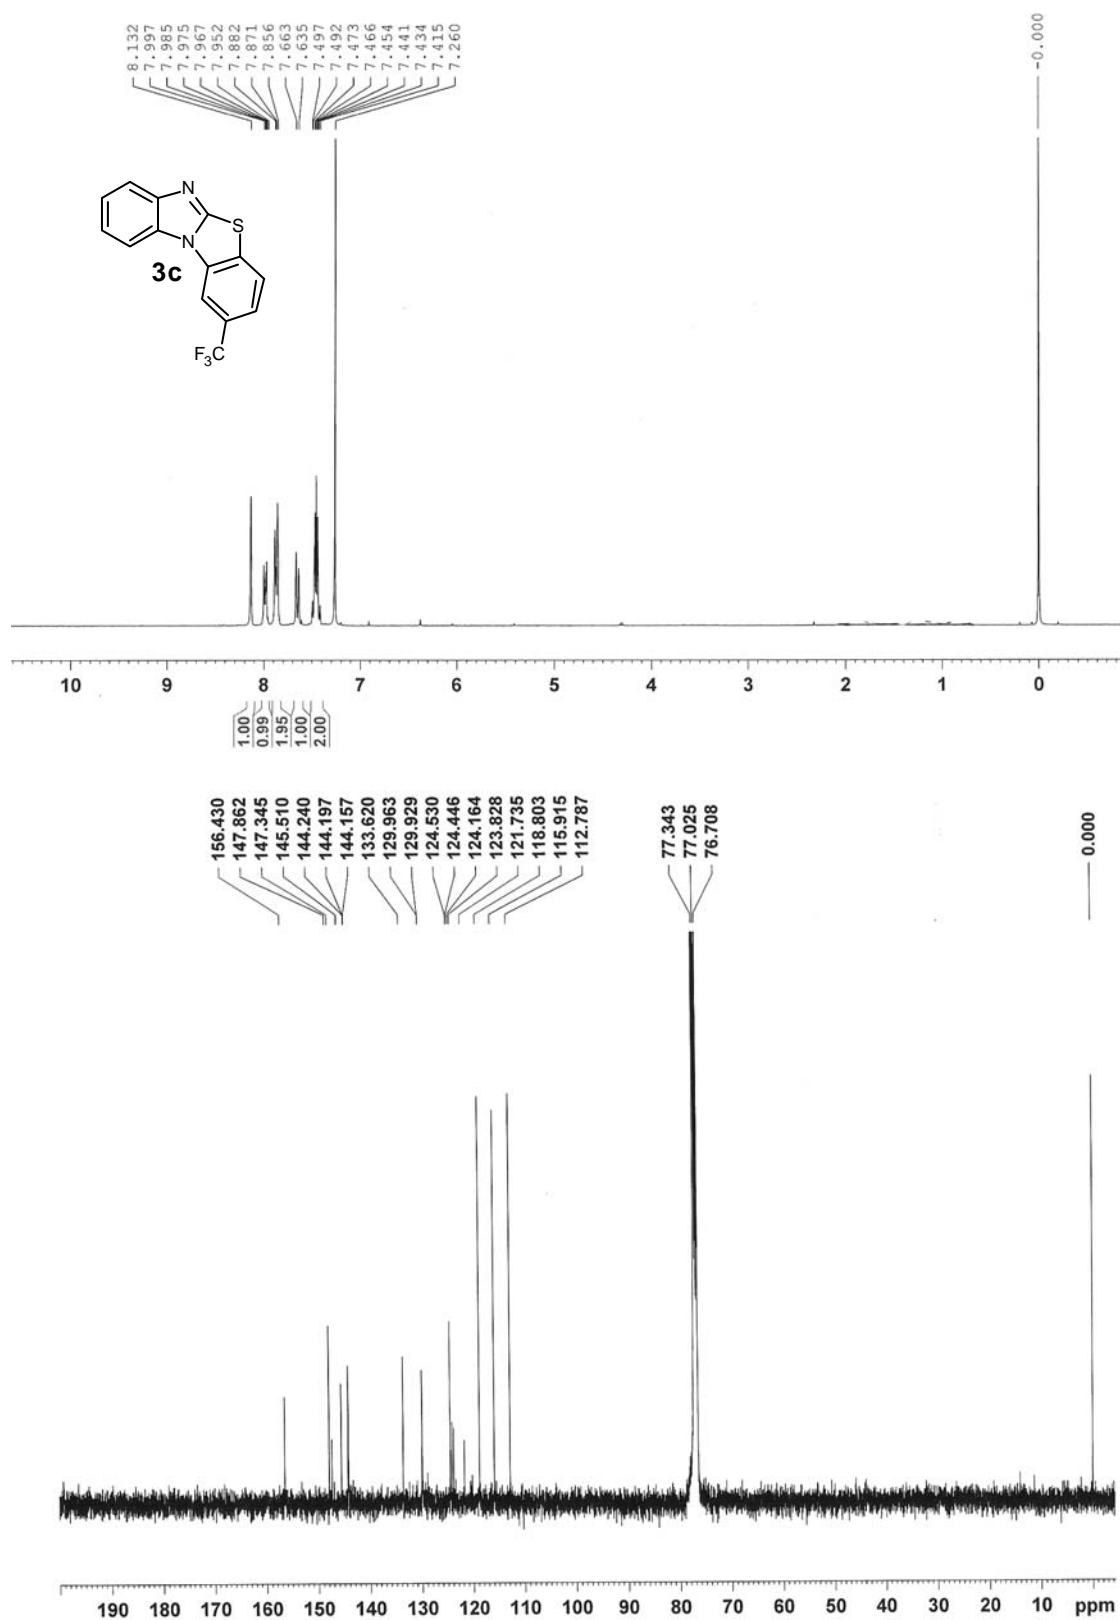

Electronic Supplementary Material (ESI) for Organic & Biomolecular Chemistry  
This journal is © The Royal Society of Chemistry 2012

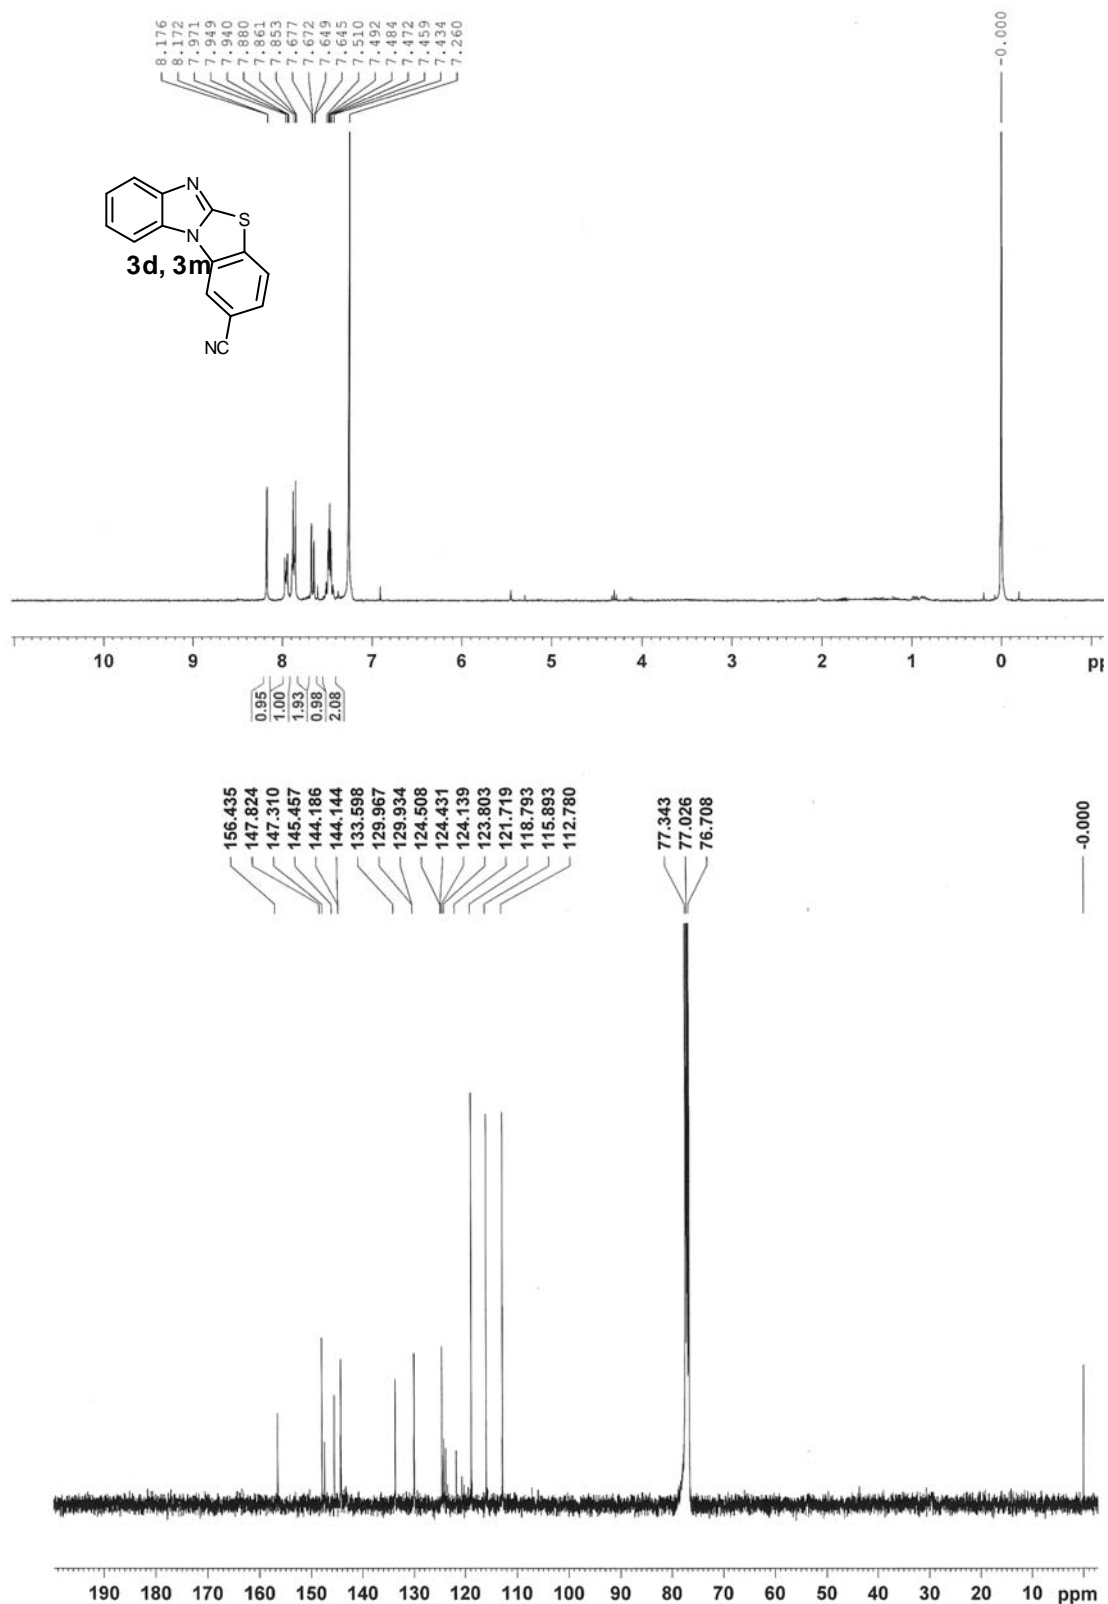

Electronic Supplementary Material (ESI) for Organic & Biomolecular Chemistry  
This journal is © The Royal Society of Chemistry 2012

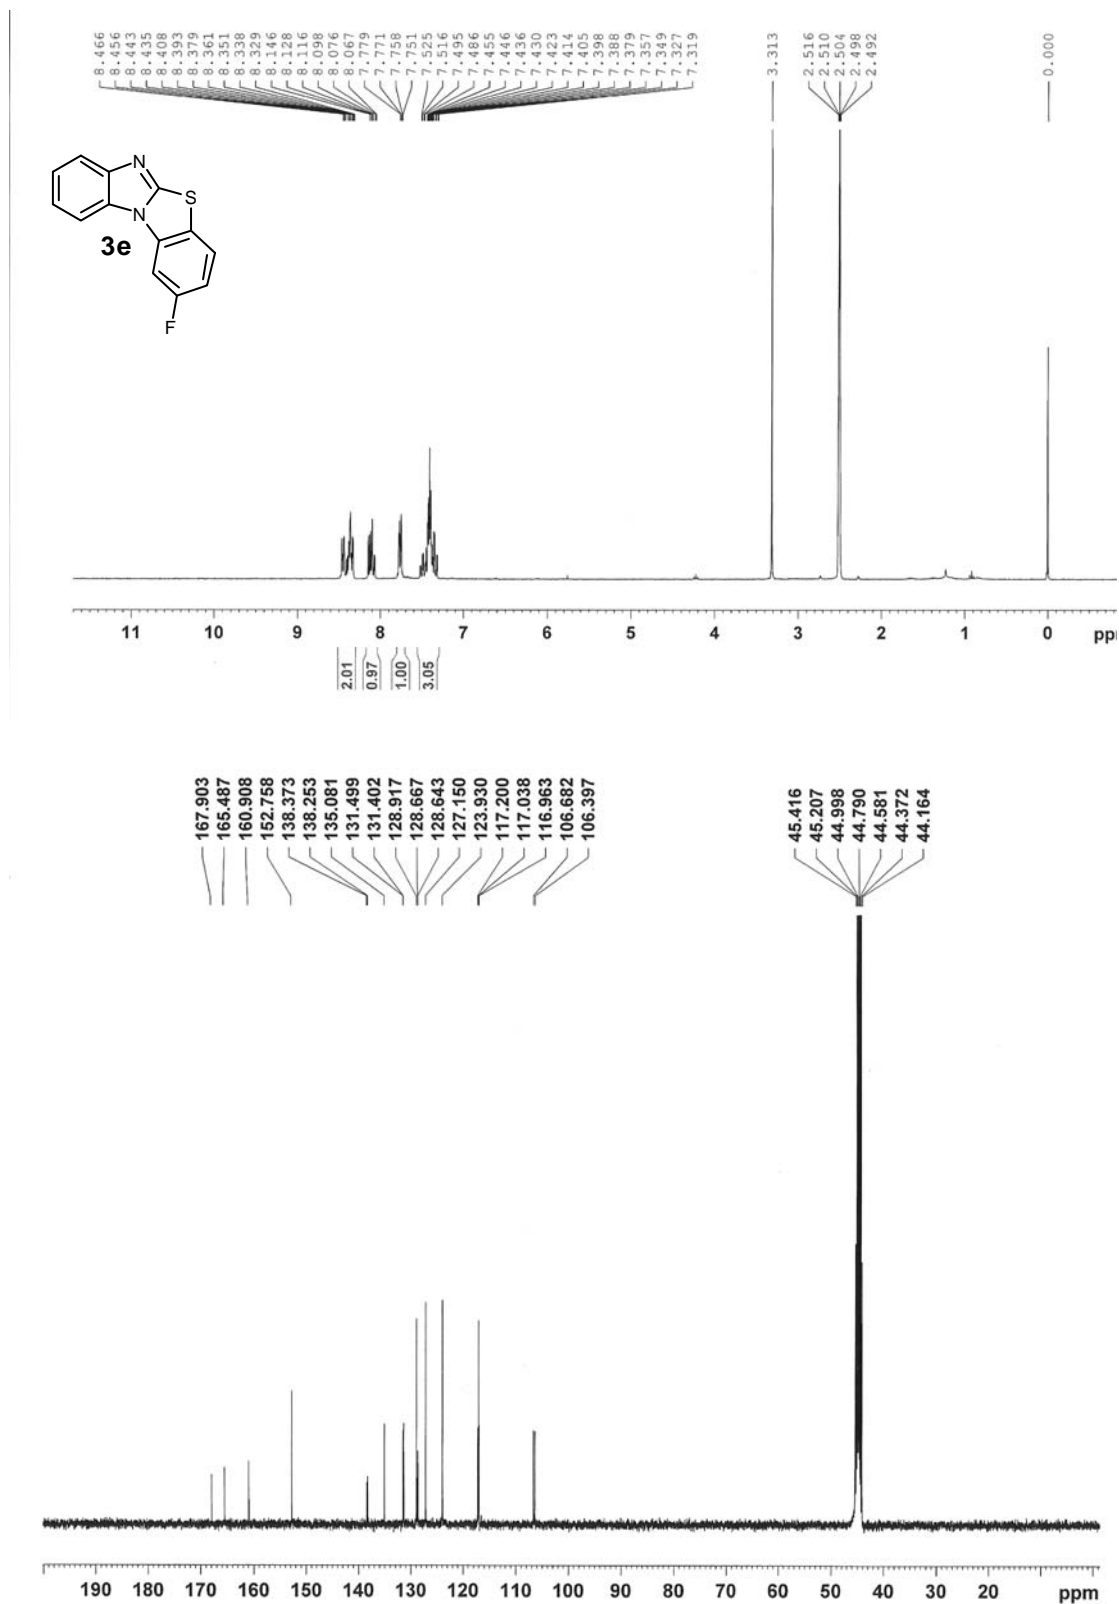

Electronic Supplementary Material (ESI) for Organic & Biomolecular Chemistry  
This journal is © The Royal Society of Chemistry 2012

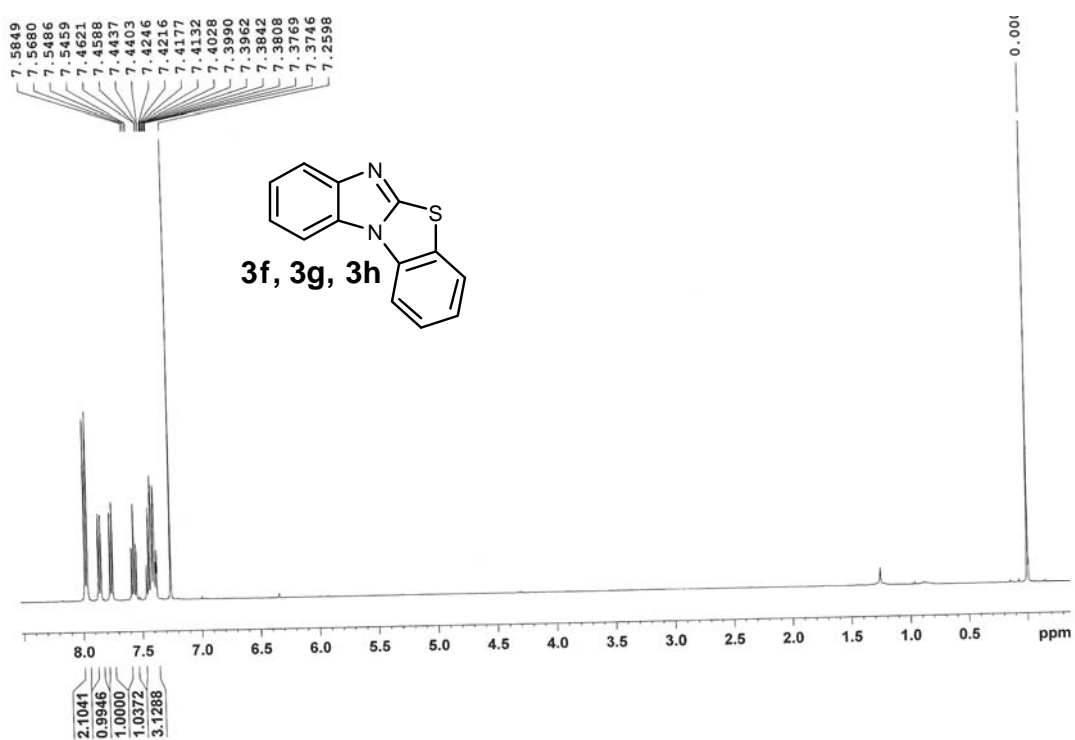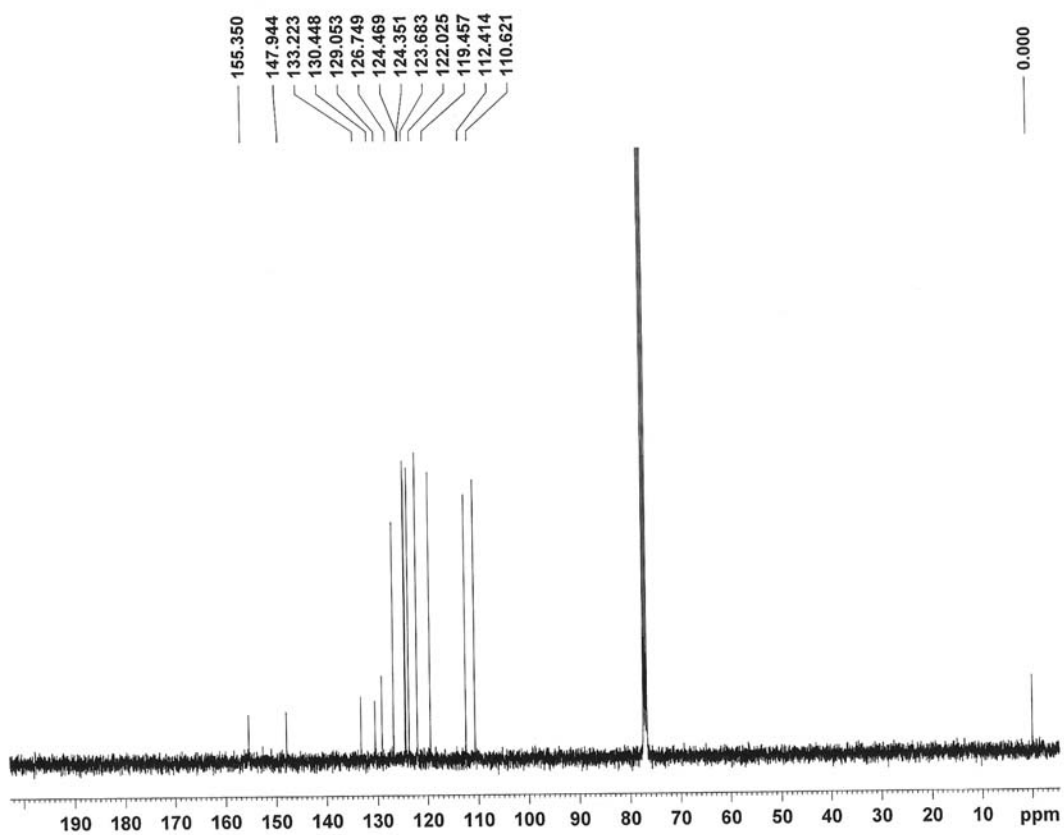

Electronic Supplementary Material (ESI) for Organic & Biomolecular Chemistry  
This journal is © The Royal Society of Chemistry 2012

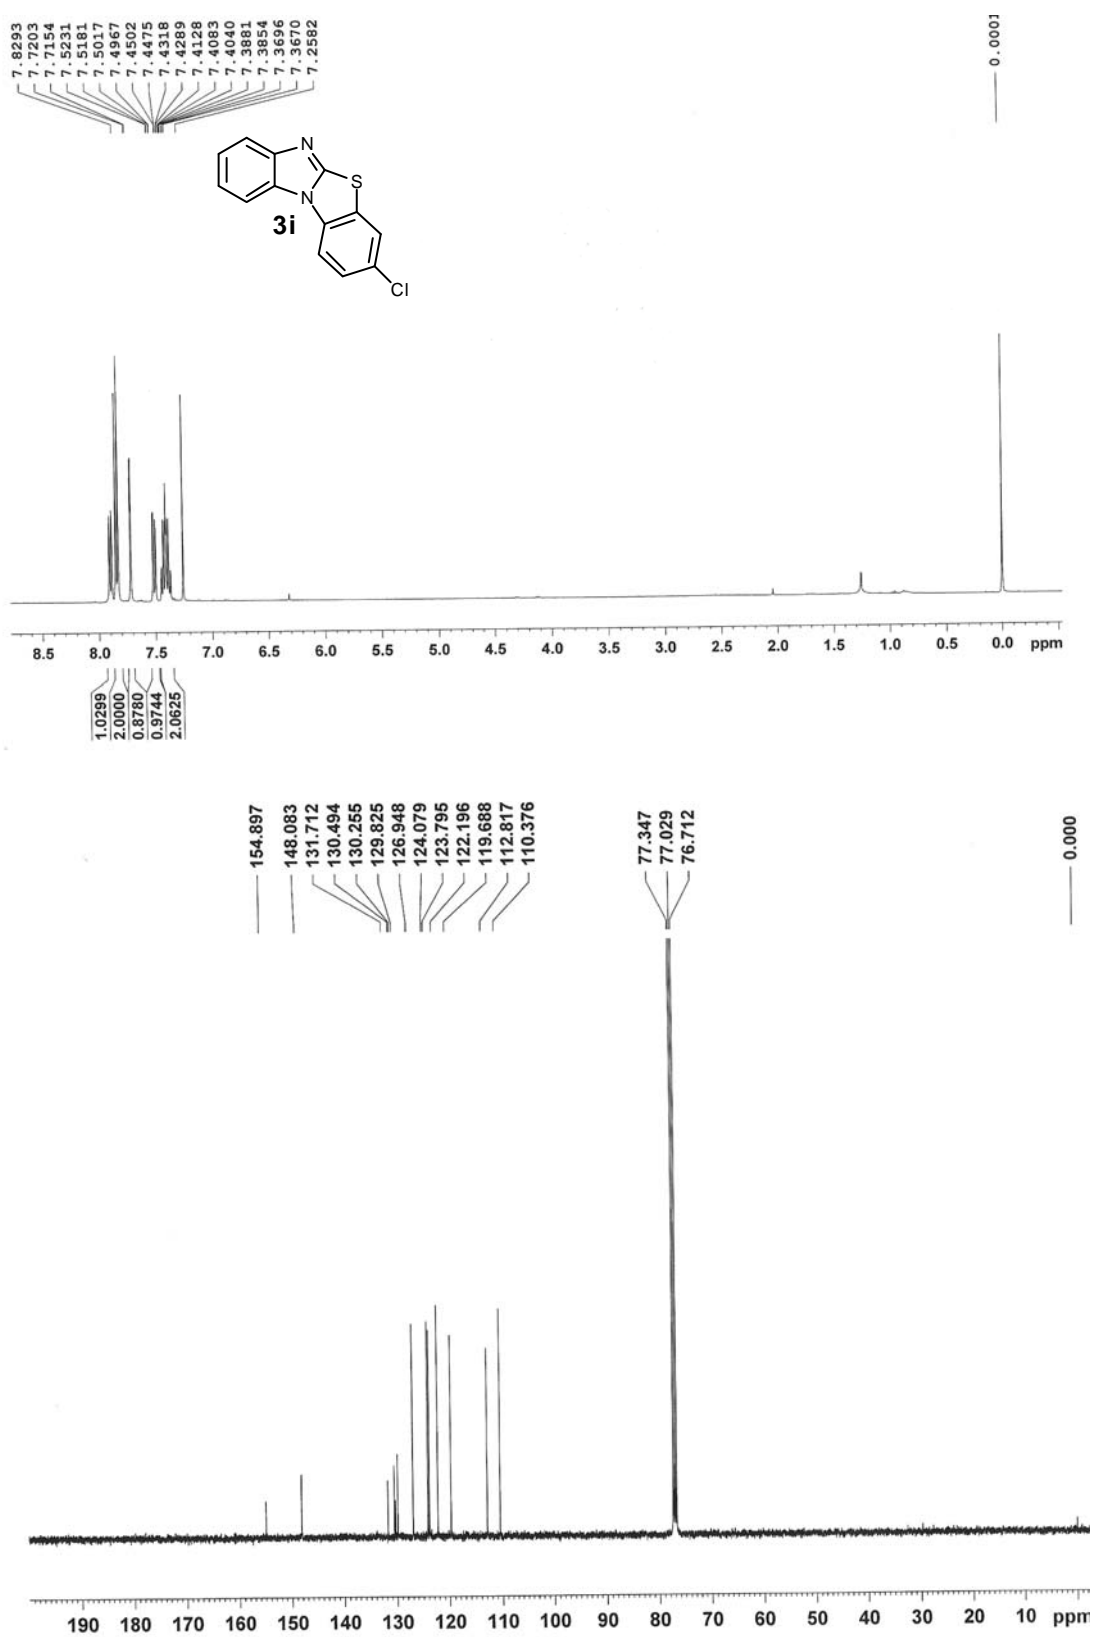

Electronic Supplementary Material (ESI) for Organic & Biomolecular Chemistry  
This journal is © The Royal Society of Chemistry 2012

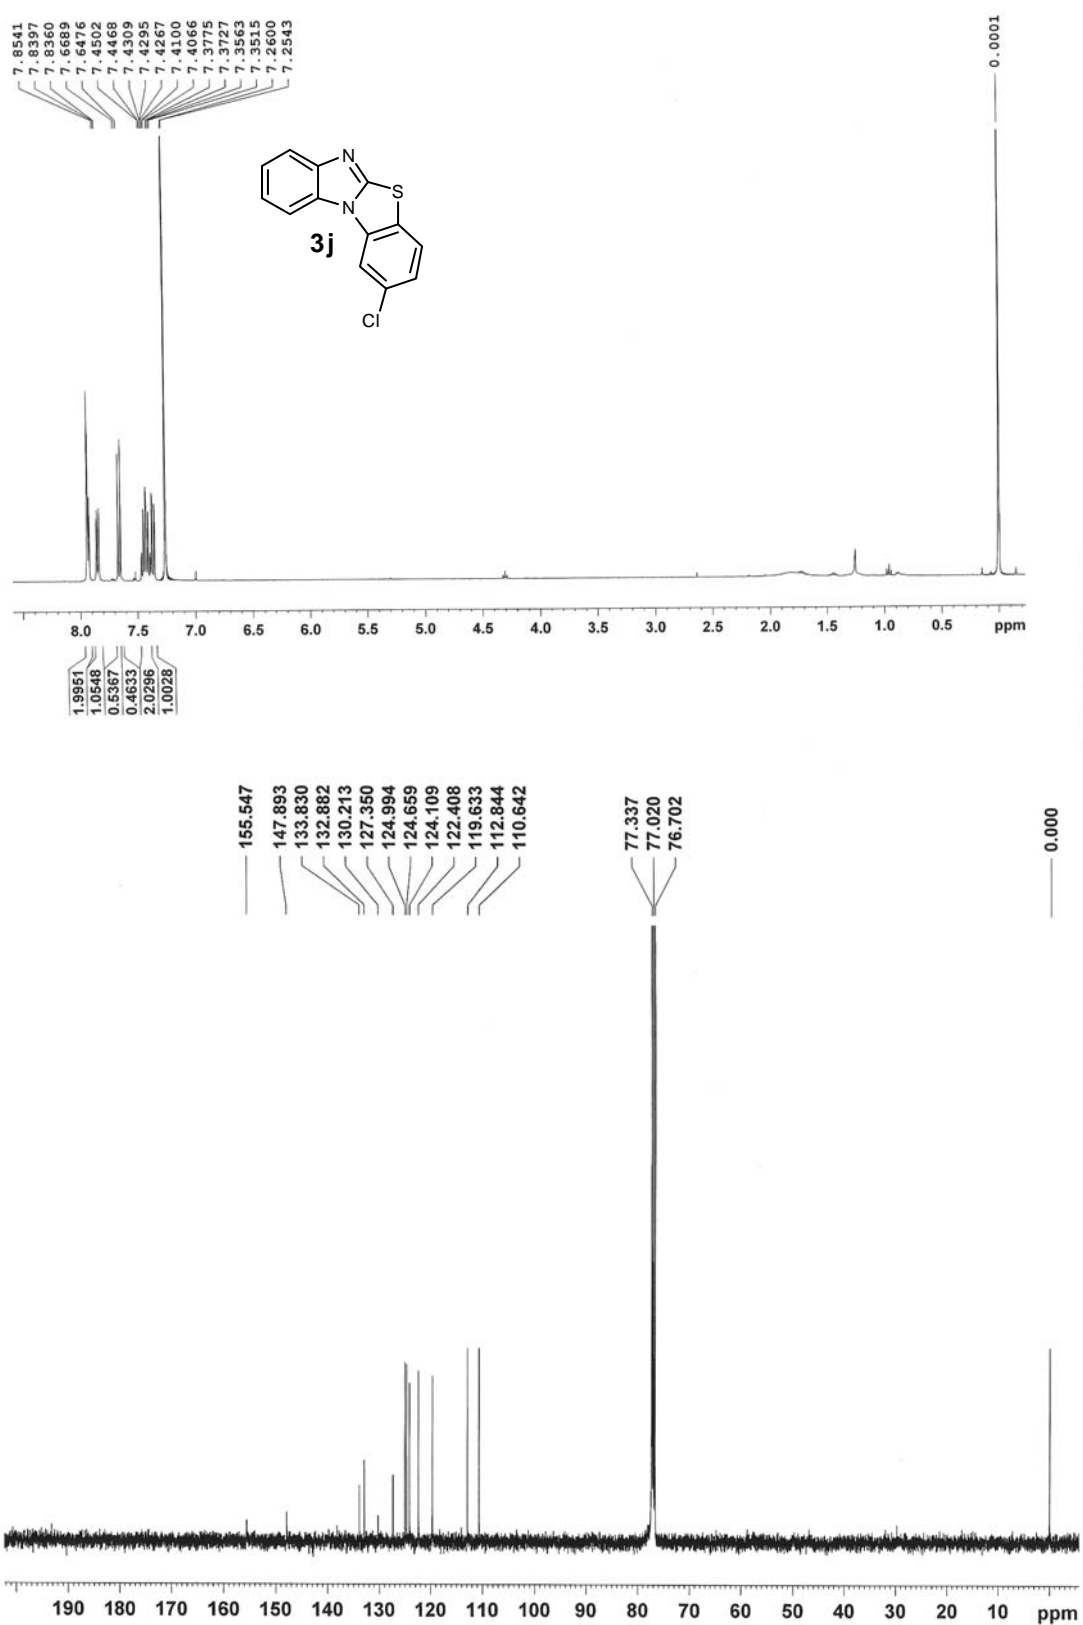

Electronic Supplementary Material (ESI) for Organic & Biomolecular Chemistry  
This journal is © The Royal Society of Chemistry 2012

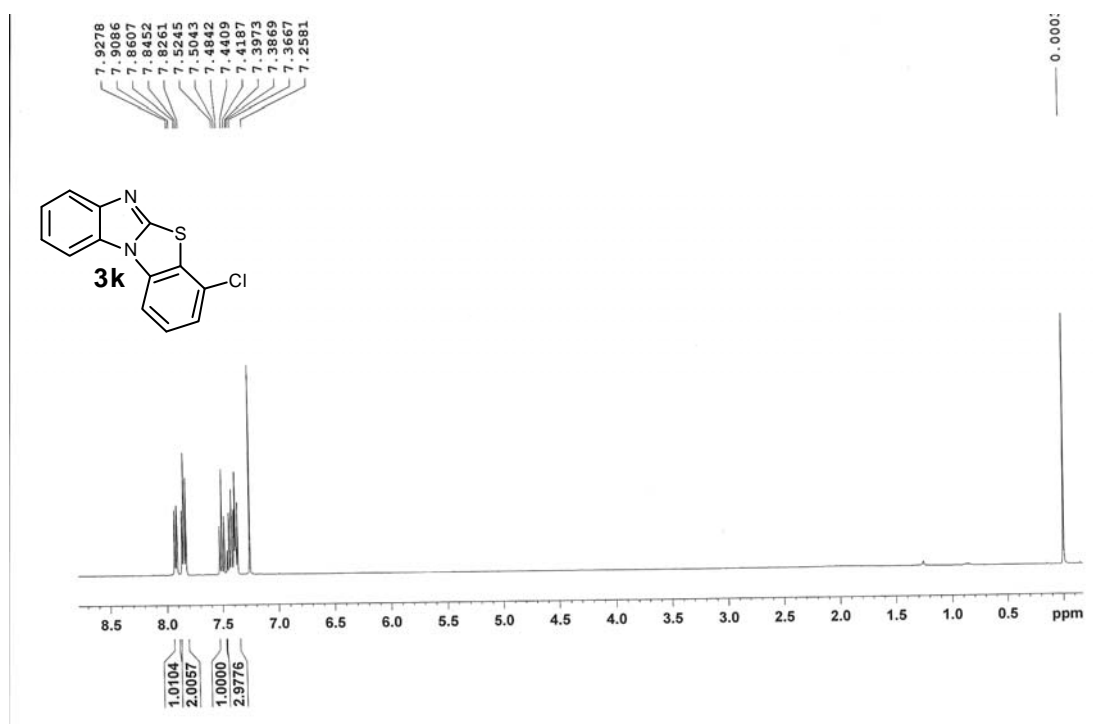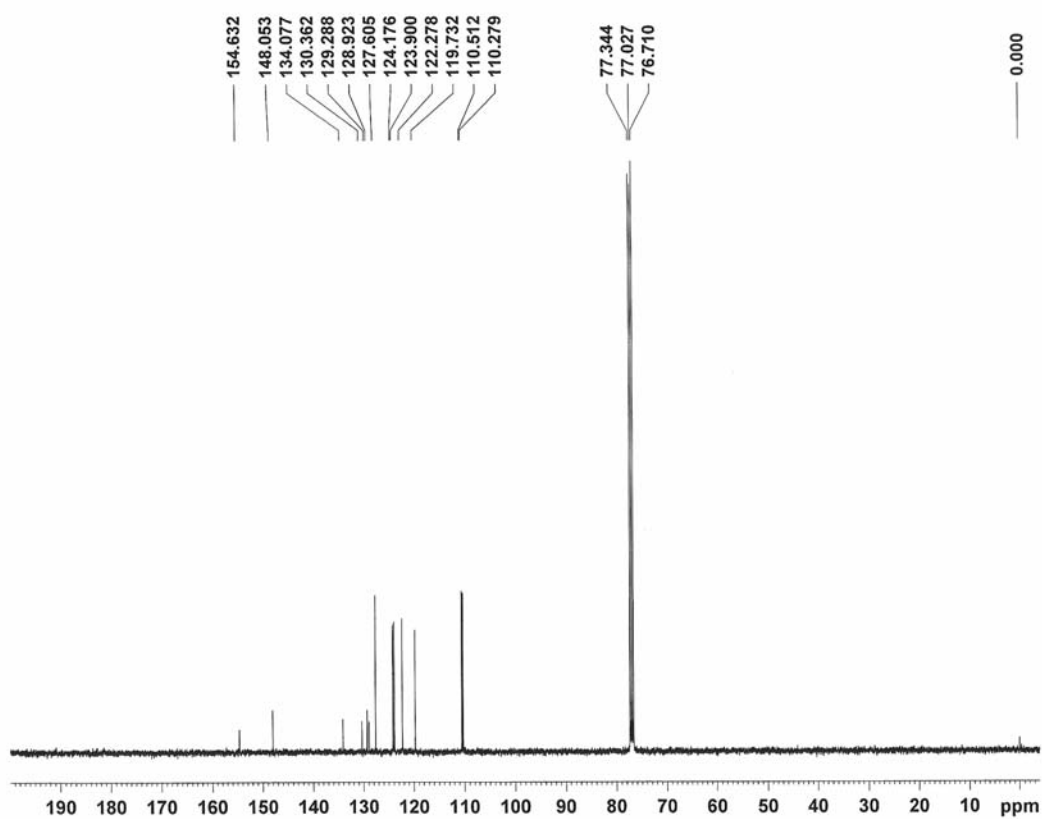

Electronic Supplementary Material (ESI) for Organic & Biomolecular Chemistry  
This journal is © The Royal Society of Chemistry 2012

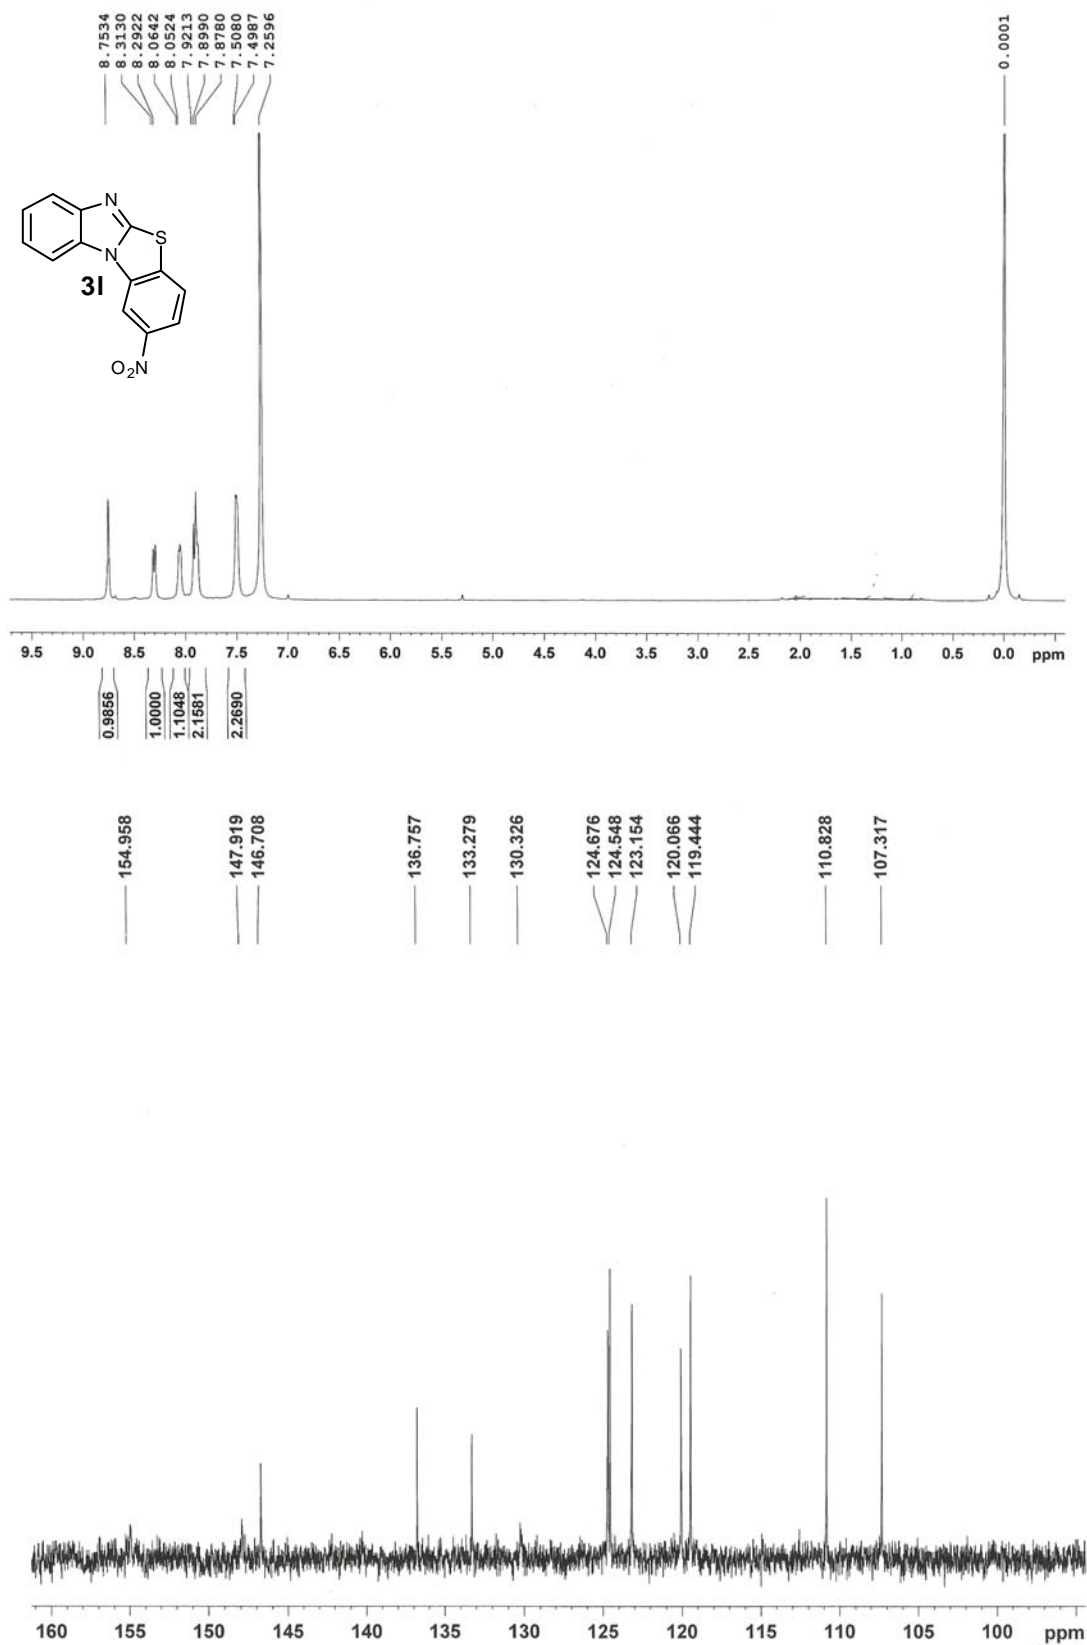



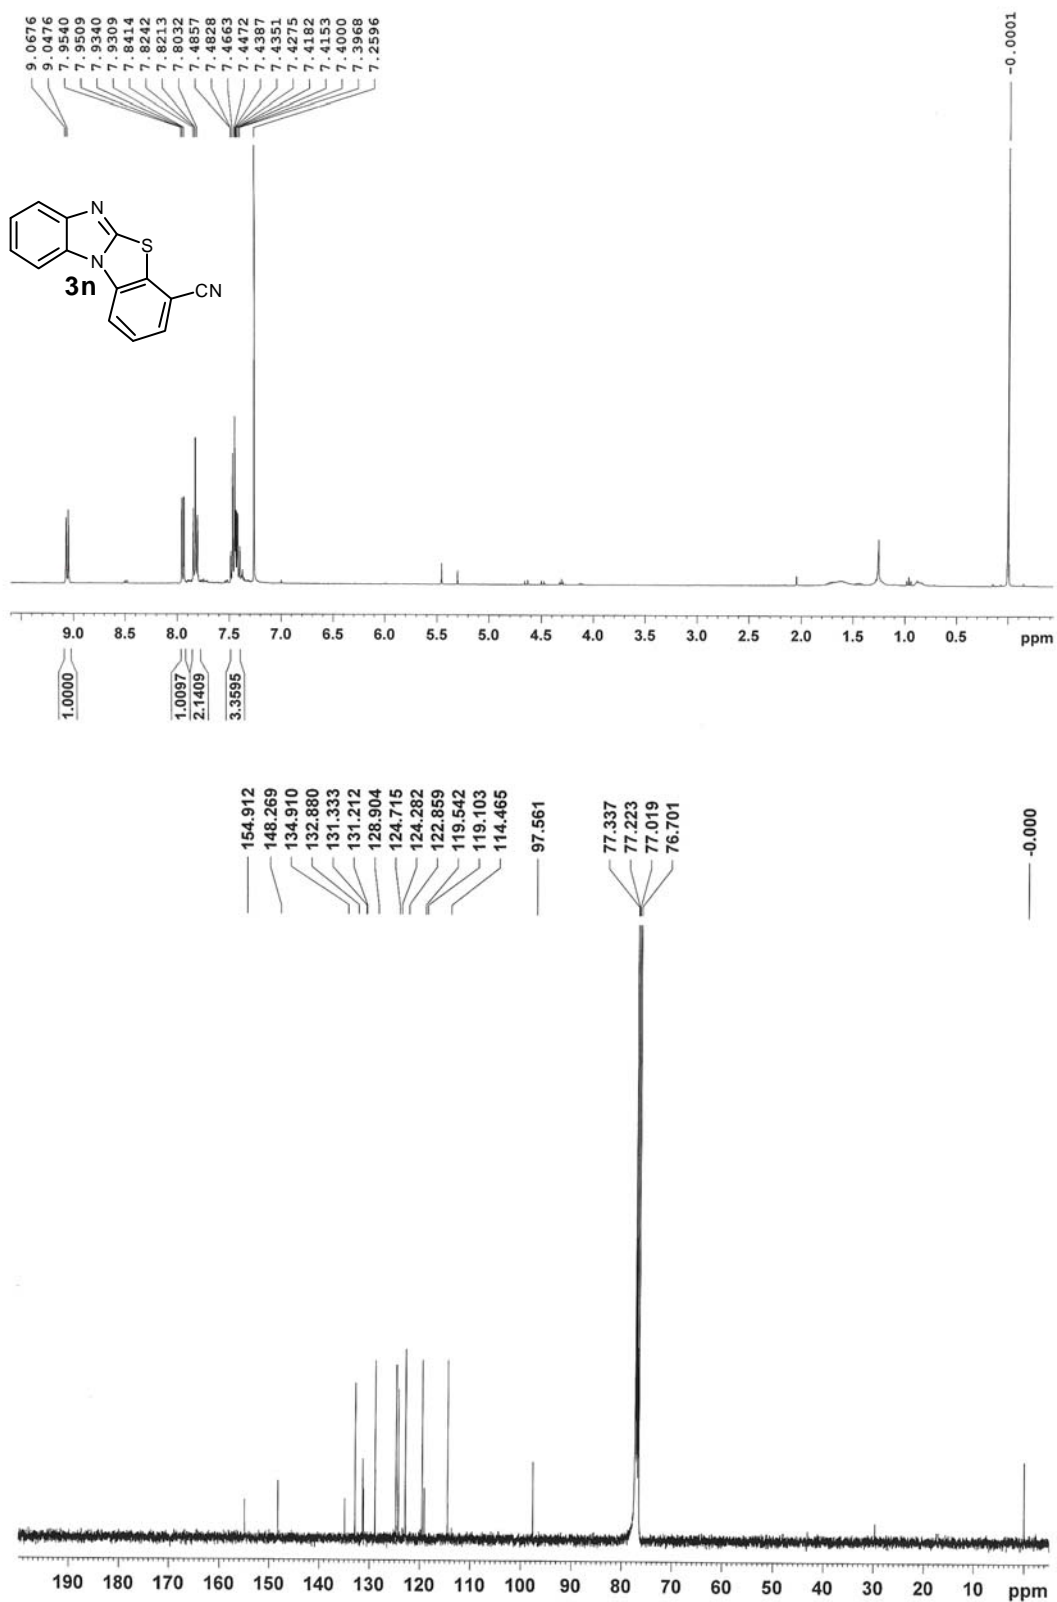

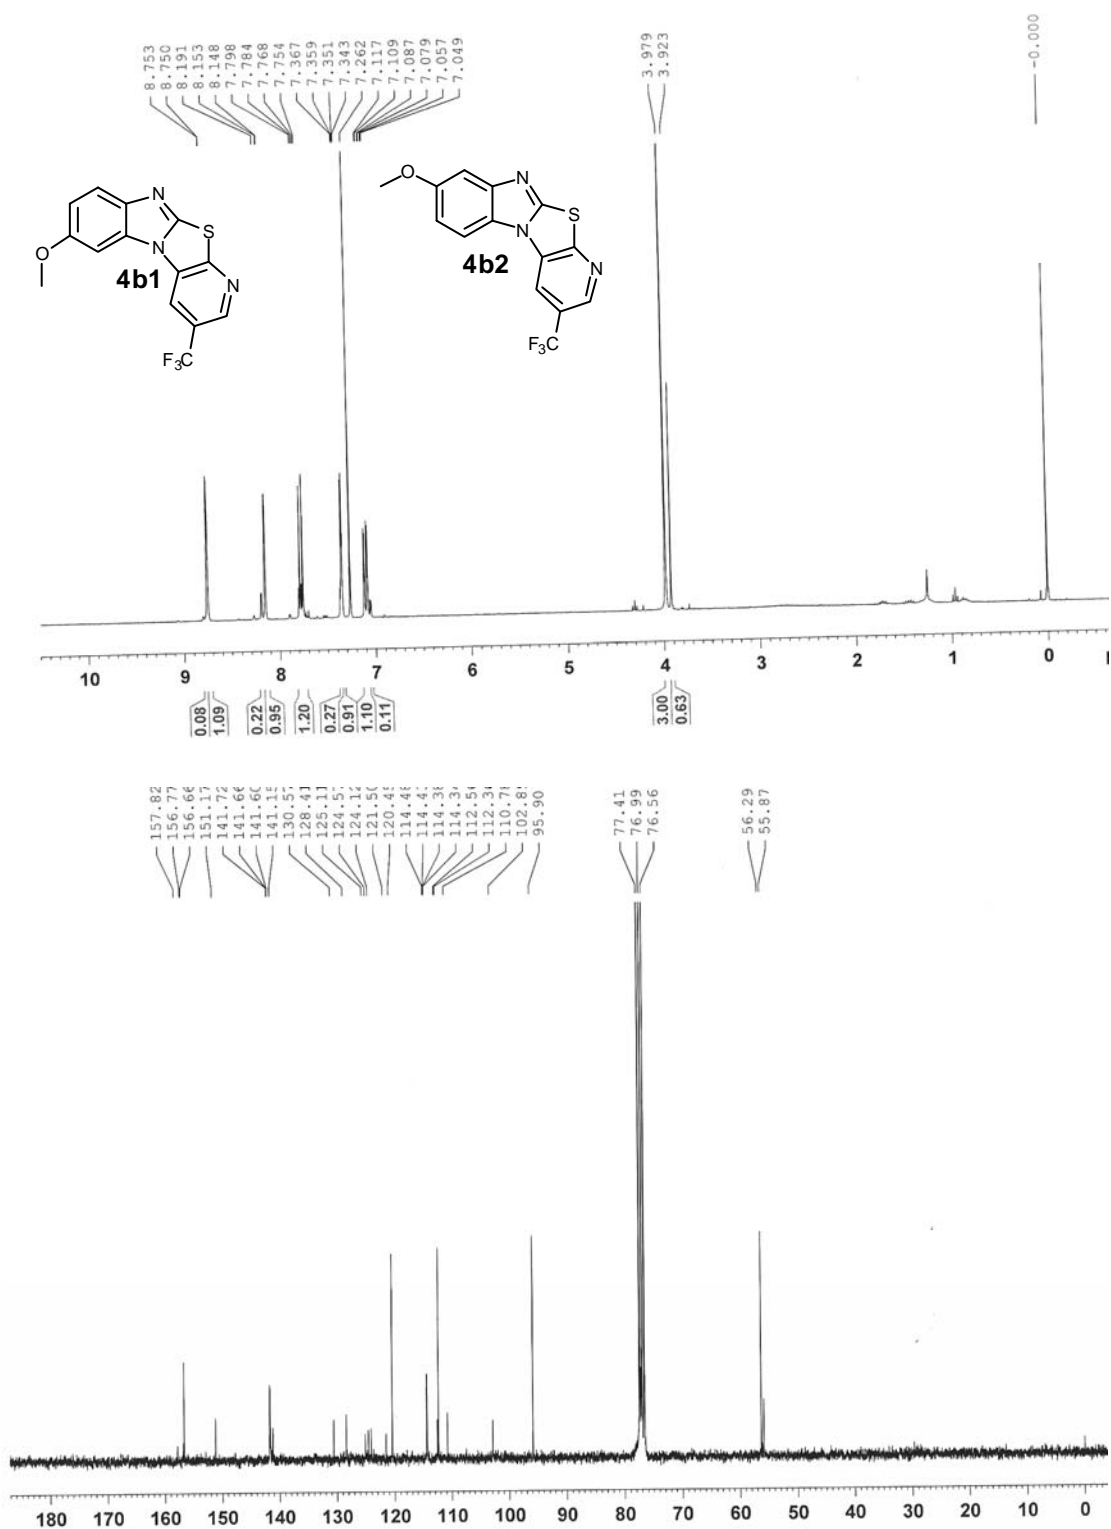

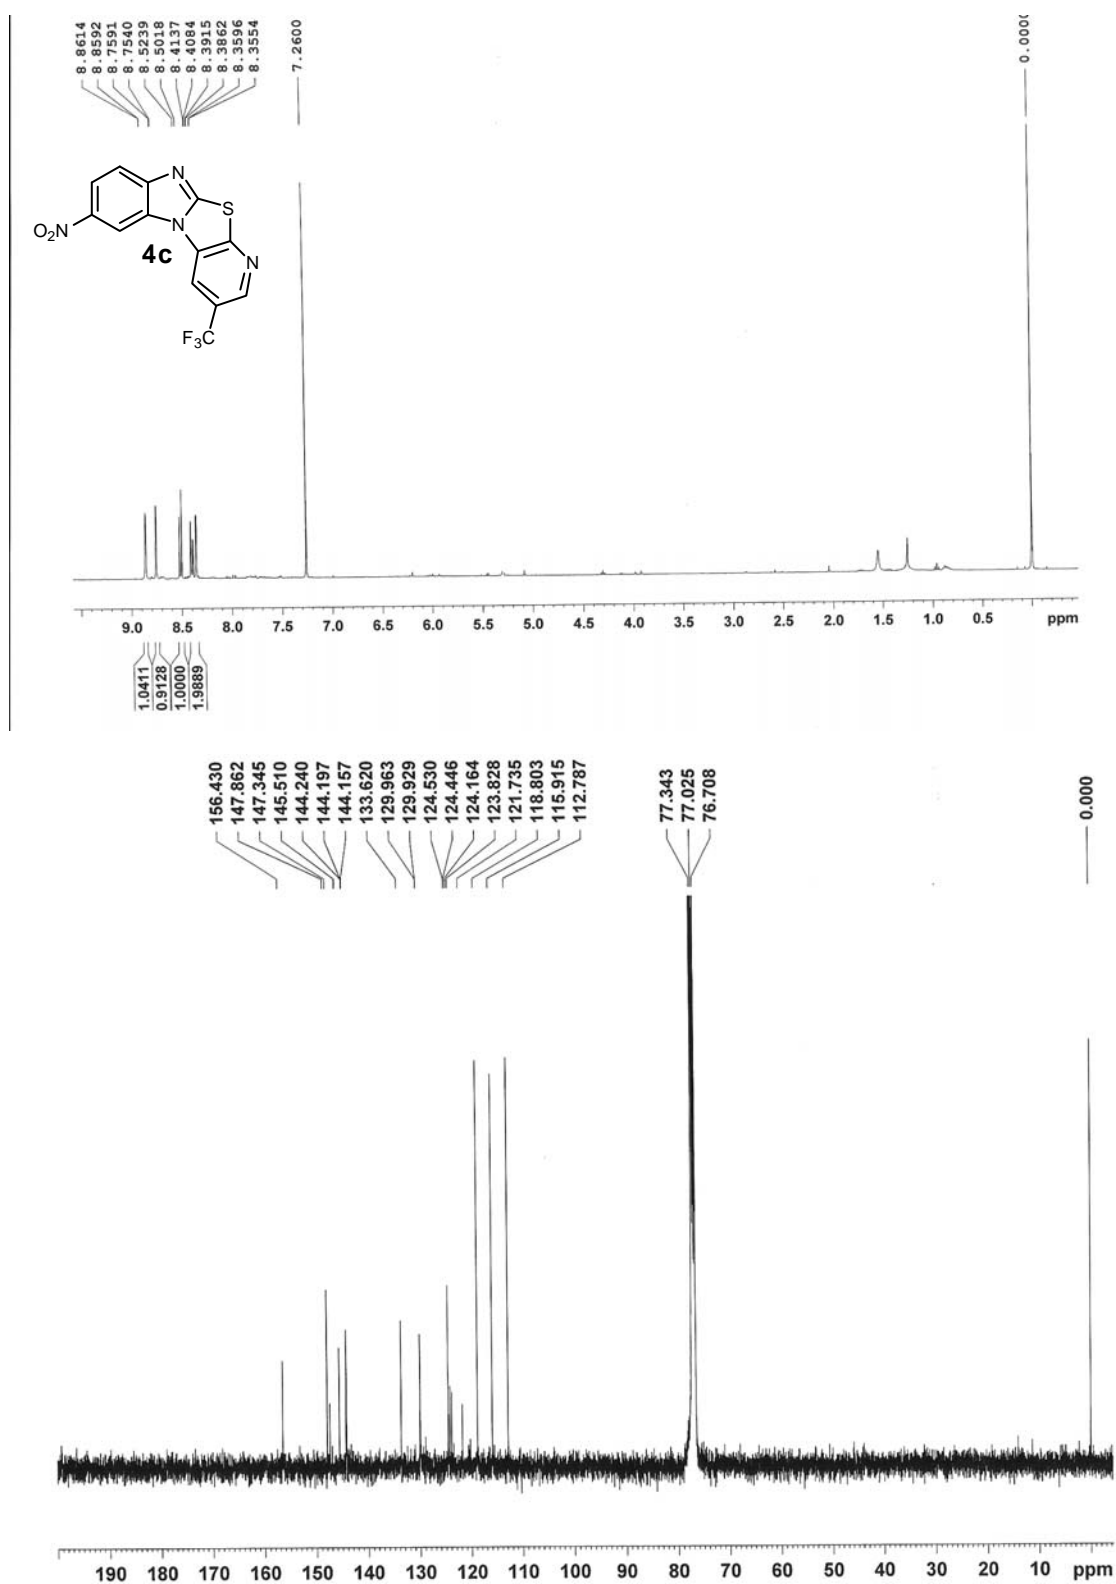

Electronic Supplementary Material (ESI) for Organic & Biomolecular Chemistry  
This journal is © The Royal Society of Chemistry 2012

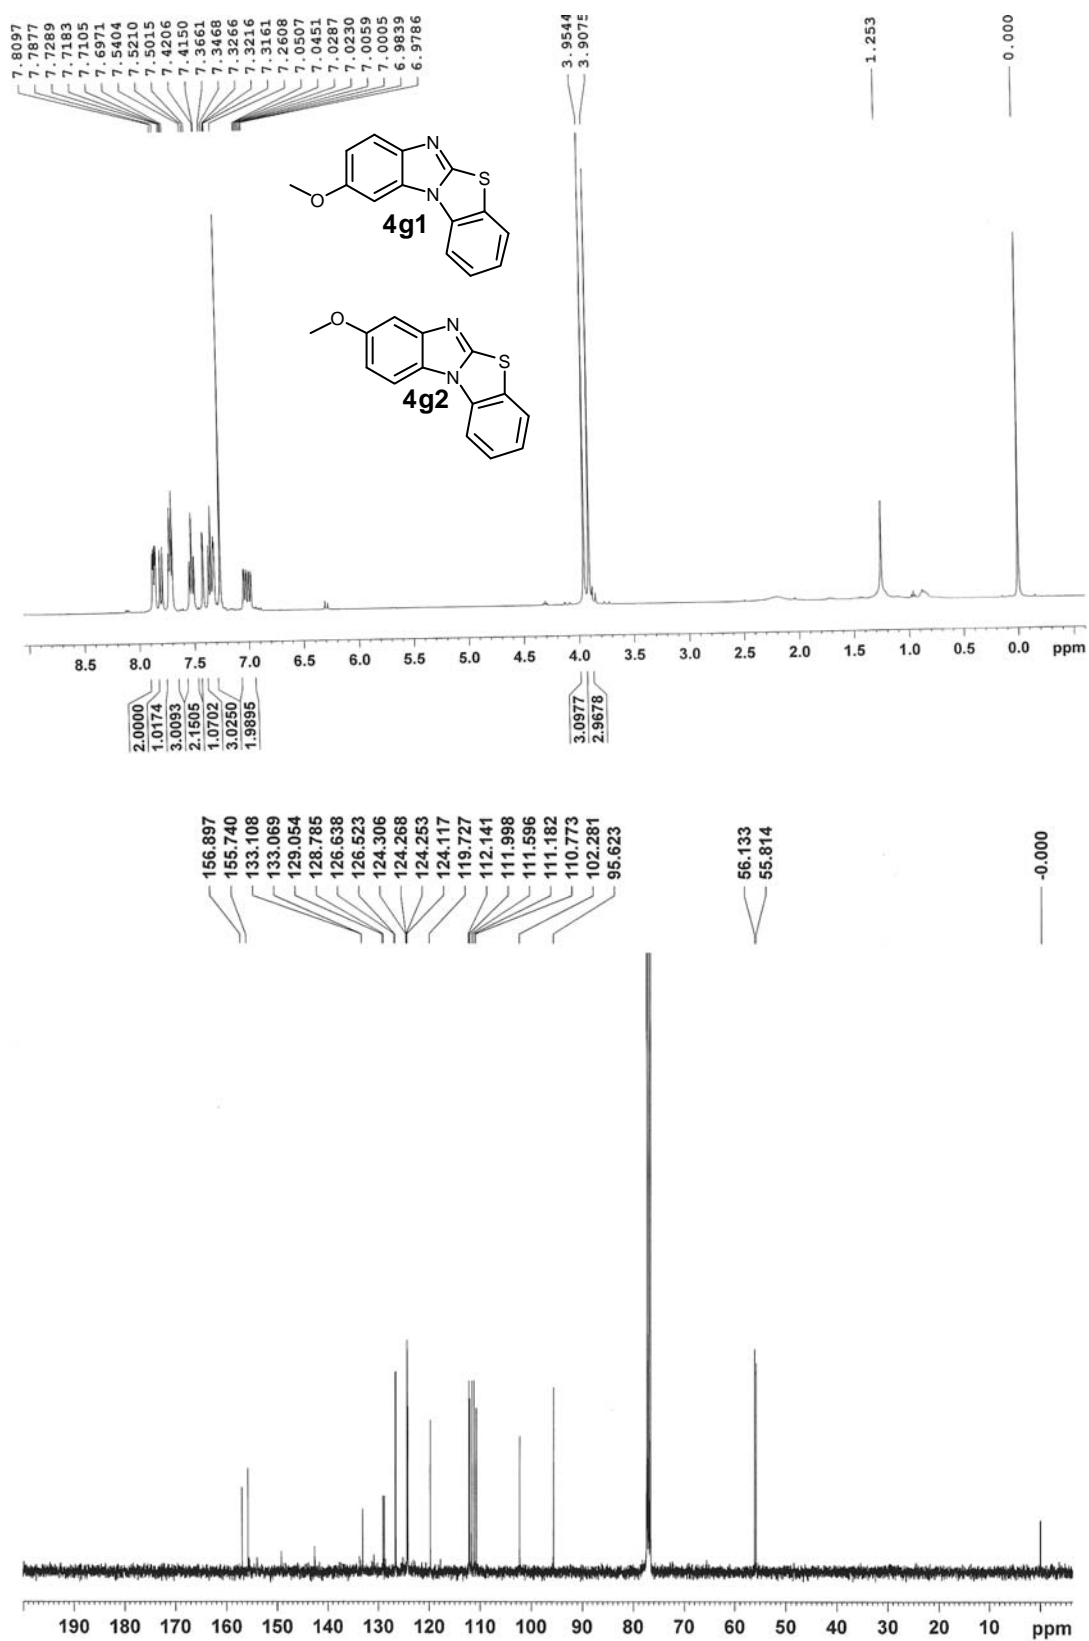

Electronic Supplementary Material (ESI) for Organic & Biomolecular Chemistry  
This journal is © The Royal Society of Chemistry 2012

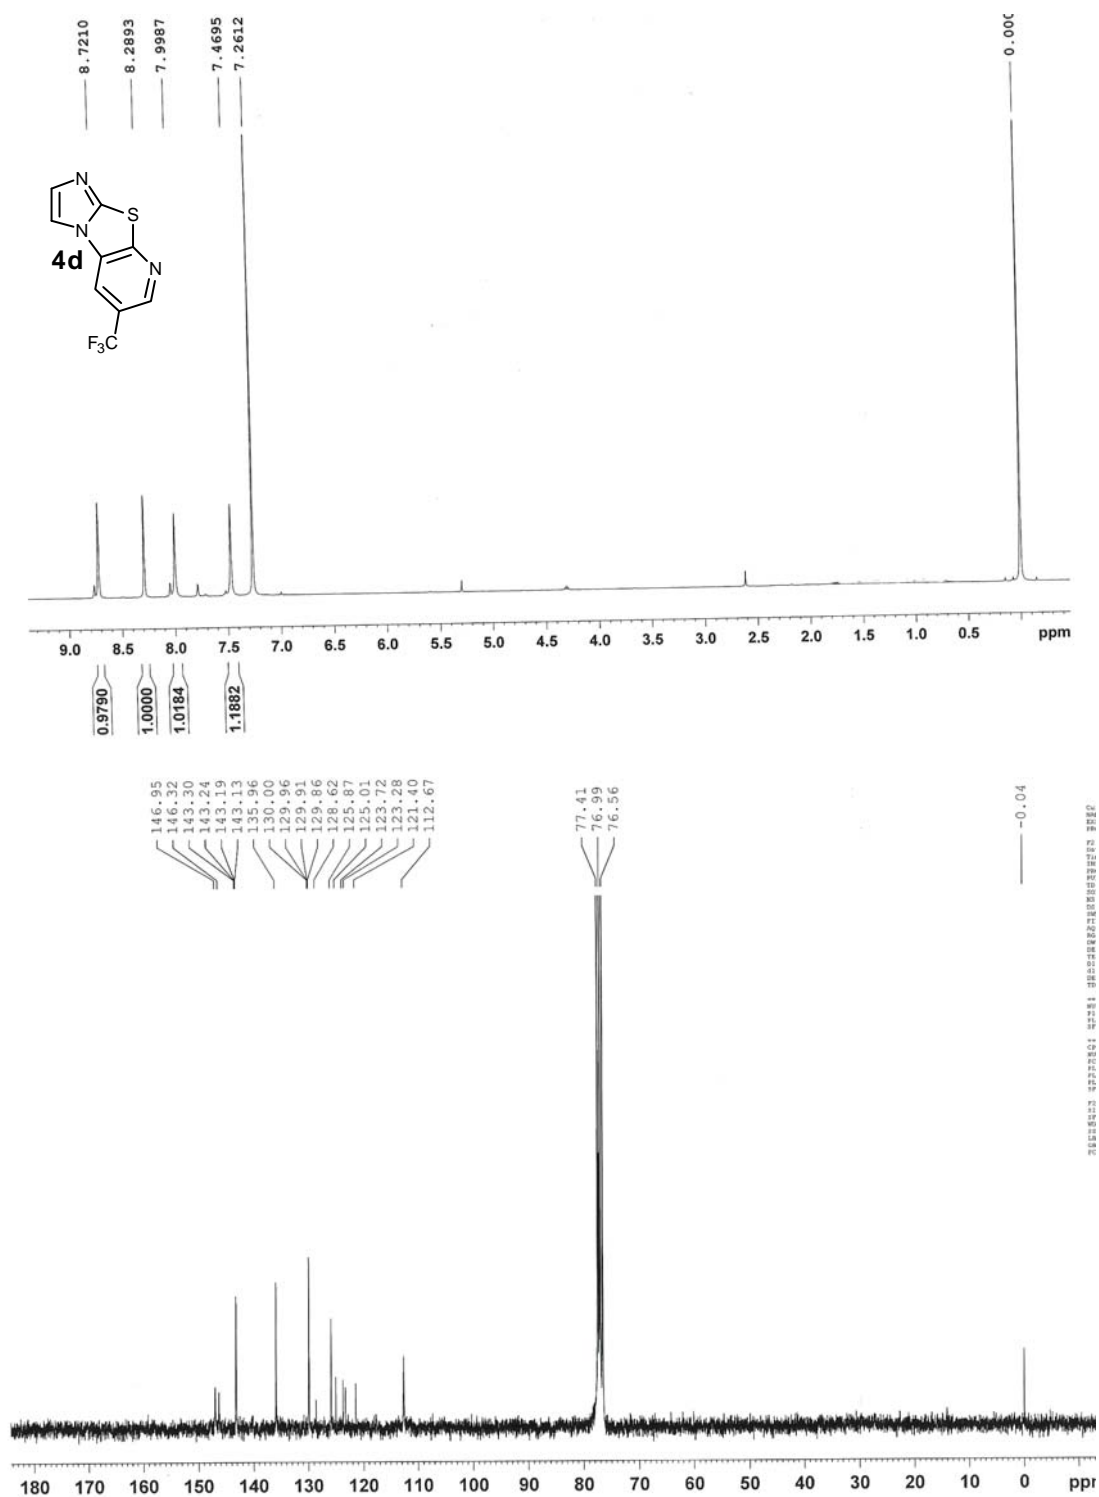

Supplement: c2ob26211h.pdf [file c2ob26211h.pdf]
